# Supplementary material
Source: Springer Nature journal article supplement (https://www.springermedizin.de/resource/supplementary/12936_2013_2924_MOESM2_ESM.pdf/9544626)
Supplement: MOESM2 [file 9544626]

**MICROSCOPY**  
**2 hours\***

**NEGATIVE**

**POSITIVE**

**GENUS-SPECIFIC**  
**Real-time PCR**  
*Plasmodium* spp.  
**24 hours\***

**SPECIES-SPECIFIC**  
**Real-time PCR**  
*Pf, Pv, Poc, Pow, Pm, Pk\*\**  
**24 hours\***
